# Supplementary material
Source: publisher site journal article supplement (https://www.spandidos-publications.com/345/downloadSupplementary)

Figure S1. Emodin downregulates P2X7 protein expression based on fluorescence intensity analysis (n=3; 'n' refers to the number of samples). \*\*P<0.01 vs. control group, ##P<0.01 vs. ATP group. ATP, adenosine triphosphate; P2X7, P2X ligand-gated ion channel 7.

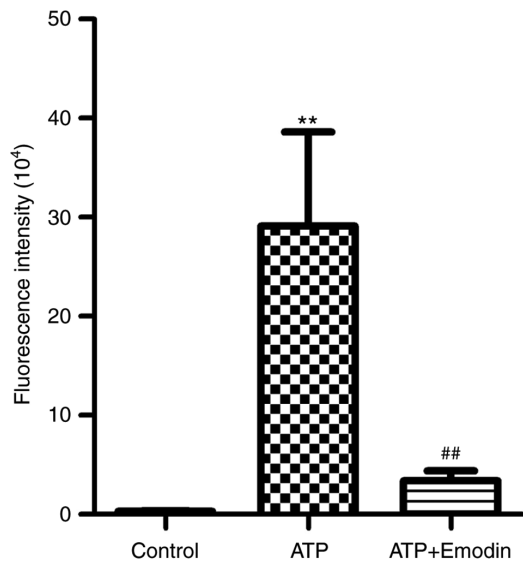

Figure S2. Effects of emodin and P2X7 overexpression on P2X7 protein expression based on fluorescence intensity analysis (n=3; 'n' refers to the number of samples). \*\*P<0.01 vs. control group; NS, not significant; ATP, adenosine triphosphate; P2X7, purinergic receptor P2X, ligand-gated ion channel, 7.

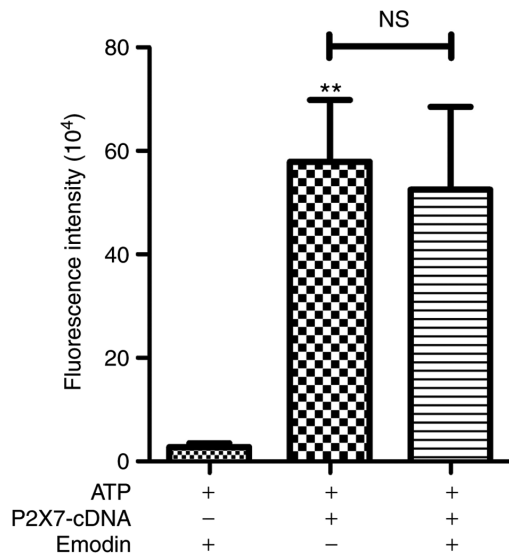

Supplement: Supplementary file 1 [file downloadSupplementary]
